# Supplementary material
Source: HighWire-hosted journal article supplement (https://ebm.bmj.com/content/bmjebm-2021-111724)
Supplement: inline-supplementary-material-2 [file inline-supplementary-material-2.pdf]

| First author    | Year | Publication type | No. randomised | Clinical condition(s)                                 | Age  | % -female | Interventions |                 |
|-----------------|------|------------------|----------------|-------------------------------------------------------|------|-----------|---------------|-----------------|
|                 |      |                  |                |                                                       |      |           | Experimental  | Control         |
| Abdel-Hady      | 2011 | Abstract         | 100            | Heart failure, EF<35%                                 | NR   | NR        | Ivabradine    | Placebo         |
| Abdel-Salam     | 2015 | Paper            | 43             | Dilated cardiomyopathy, EF<40%                        | 50.8 | 46.5      | Ivabradine    | Placebo         |
| Adamyan         | 2010 | Abstract         | 118            | Heart failure, EF>50%                                 | 58.0 | 24.8      | Ivabradine    | No intervention |
| Adamyan         | 2008 | Abstract         | 145            | Heart failure, EF<35%                                 | 58.0 | 30.0      | Ivabradine    | No intervention |
| Adamyan         | 2015 | Abstract         | 104            | Heart failure, EF>50%                                 | 63.2 | NR        | Ivabradine    | No intervention |
| Al Saadi        | 2013 | Abstract         | NR             | Stable ischemic heart failure                         | NR   | NR        | Ivabradine    | No intervention |
| AROUTUNOV       | 2008 | Abstract         | 24             | Decompensated heart failure                           | NR   | NR        | Ivabradine    | No intervention |
| Babushkina      | 2020 | Article          | 109            | Heart failure, EF>50%                                 | 57.7 | 37        | Ivabradine    | No intervention |
| Bansal          | 2019 | Abstract         | 309            | Stable ischemic heart failure                         | NR   | NR        | Ivabradine    | No intervention |
| Barilla         | 2016 | Paper            | 58             | Acute myocardial infarction, cardiogenic shock        | 55.4 | 32.8      | Ivabradine    | No intervention |
| Bi              | 2020 | Paper            | 198            | Heart failure                                         | 56.8 | 46.0      | Ivabradine    | No intervention |
| Cao             | 2019 | Paper            | 82             | Heart failure, EF<35%                                 | 69.3 | 50.0      | Ivabradine    | No intervention |
| Cavosoglu       | 2015 | Paper            | 58             | Decompensated heart failure, EF<35%                   | 65.6 | 25.7      | Ivabradine    | No intervention |
| Chaudhari       | 2014 | Abstract         | 158            | Ischemic heart failure                                | NR   | NR        | Ivabradine    | No intervention |
| Chen            | 2020 | Paper            | 60             | Chronic heart failure                                 | 62.5 | 35        | Ivabradine    | No intervention |
| Chen            | 2021 | Paper            | 100            | Chronic heart failure                                 | 57.8 | 42        | Ivabradine    | No intervention |
| Chen HX         | 2021 | Paper            | 60             | Severe chronic heart failure                          | 70.5 | 45        | Ivabradine    | No intervention |
| Cheng           | 2017 | Paper            | 90             | Heart failure, EF<45%                                 | 71.0 | 44.4      | Ivabradine    | No intervention |
| Chumburidze     | 2013 | Abstract         | 30             | Dilated cardiomyopathy EF<35%                         | 54.0 | NR        | Ivabradine    | Placebo         |
| Cong            | 2018 | Paper            | 90             | Heart failure                                         | 64.6 | 60.0      | Ivabradine    | No intervention |
| Deng            | 2017 | Paper            | 82             | Heart failure                                         | 61.8 | 40.2      | Ivabradine    | No intervention |
| Di              | 2020 | Paper            | 126            | Heart failure, EF<40%, HR>70                          | 66.4 | 43.4      | Ivabradine    | No intervention |
| Fox (BEAUTIFUL) | 2008 | Paper            | 10917          | Stable coronary artery disease, heart failure, EF<40% | 65.2 | 17.1      | Ivabradine    | Placebo         |
| Fu              | 2021 | Paper            | 64             | Chronic heart failure, EF 40-50%, HR>70               | NR   | NR        | Ivabradine    | No intervention |
| Gou             | 2017 | Paper            | 60             | Decompensated heart failure, EF<40%                   | 63.7 | 48.3      | Ivabradine    | No intervention |
| Guo             | 2017 | Paper            | 32             | Heart failure, EF<40%                                 | NR   | 0.0       | Ivabradine    | No intervention |
| He              | 2019 | Paper            | 68             | Coronary artery disease, heart failure, EF 40-49%     | 64.8 | 47.1      | Ivabradine    | No intervention |
| Hu              | 2017 | Paper            | 60             | Heart failure, EF<35%                                 | 68.0 | 45.0      | Ivabradine    | No intervention |
| Hu              | 2018 | Paper            | 169            | Acute myocardial infarction, heart failure            | 63.0 | 3.6       | Ivabradine    | No intervention |
| Huang J         | 2017 | Paper            | 102            | Heart failure                                         | 71.5 | 41.2      | Ivabradine    | No intervention |
| Komajda (EDIFY) | 2017 | Paper            | 179            | Heart failure, EF>45%                                 | 72.5 | 64.8      | Ivabradine    | Placebo         |

|               |      |          |     |                                                |      |      |            |                 |
|---------------|------|----------|-----|------------------------------------------------|------|------|------------|-----------------|
| Kosmala       | 2013 | Paper    | 61  | Heart failure, EF >50%                         | 67.3 | 82.0 | Ivabradine | Placebo         |
| Li            | 2018 | Paper    | 89  | Heart failure                                  | 57.5 | 47.2 | Ivabradine | No intervention |
| Li B          | 2020 | Paper    | 110 | Chronic heart failure, HR>100                  | 64.2 | 35.4 | Ivabradine | No intervention |
| Li Q          | 2020 | Paper    | 96  | Chronic heart failure, EF<50%, HR>75           | 65.3 | 33.6 | Ivabradine | No intervention |
| Liu           | 2019 | Paper    | 96  | Heart failure                                  | 63.8 | 51.0 | Ivabradine | No intervention |
| Liu           | 2020 | Paper    | 98  | Heart failure                                  | 67.4 | 60.2 | Ivabradine | Placebo         |
| Liu Y         | 2020 | Paper    | 122 | Heart failure, EF>50%, HR>70                   | 65   | 34.4 | Ivabradine | No intervention |
| Lofrano-Alves | 2016 | Paper    | 26  | Heart failure, EF<40%                          | 42.0 | 46.2 | Ivabradine | Placebo         |
| Lu            | 2019 | Thesis   | 60  | Dilated cardiomyopathy, EF<40%                 | 47.2 | 43.3 | Ivabradine | No intervention |
| Lu            | 2020 | Paper    | 70  | Chronic heart failure, EF 30-50%               | 69.9 | 34.3 | Ivabradine | No intervention |
| Luo           | 2021 | Paper    | 120 | Heart failure, HR>70                           | 84.2 | 42.5 | Ivabradine | No intervention |
| Ma            | 2016 | Thesis   | 60  | Heart failure, EF<40%                          | NR   | NR   | Ivabradine | Placebo         |
| Ma            | 2020 | Paper    | 86  | Heart failure                                  | 58.1 | 41.9 | Ivabradine | Placebo         |
| Mansour       | 2011 | Paper    | 53  | Dilated cardiomyopathy, EF<40%                 | 49.0 | 40.0 | Ivabradine | No intervention |
| Manz          | 2003 | Paper    | 44  | Cardiomyopathy, EF 20-50%                      | 59.9 | NR   | Ivabradine | Placebo         |
| Mao           | 2018 | Paper    | 60  | Heart failure                                  | 53.1 | 31.7 | Ivabradine | No intervention |
| Masi de Luca  | 2018 | Abstract | 111 | Heart failure, EF>50%                          | 61.0 | 30.0 | Ivabradine | Placebo         |
| Moiseev       | 2011 | Abstract | 49  | Heart failure, EF<40%                          | 63.0 | 18.4 | Ivabradine | No intervention |
| Nguyen        | 2018 | Paper    | 19  | Planned CABG, EF 20-40%                        | 57.5 | 15.8 | Ivabradine | Placebo         |
| Ordu          | 2015 | Paper    | 98  | Heart failure, EF<35%                          | 65.8 | 66.3 | Ivabradine | No intervention |
| Pal           | 2015 | Paper    | 22  | Heart failure, EF>50%                          | 74.6 | 65.0 | Ivabradine | Placebo         |
| Pan           | 2020 | Paper    | 50  | Decompensated heart failure, EF<40%            | 60.1 | 44.0 | Ivabradine | No intervention |
| Potapenko     | 2011 | Paper    | 49  | Systolic, chronic heart failure                | 63.1 | 18.4 | Ivabradine | No intervention |
| Qi            | 2019 | Paper    | 96  | Heart failure                                  | 59.7 | 45.8 | Ivabradine | No intervention |
| Raja          | 2017 | Paper    | 125 | Dilated cardiomyopathy, EF<40%                 | 47.2 | 43.1 | Ivabradine | No intervention |
| Sallam        | 2016 | Paper    | 100 | Coronary artery disease, heart failure, EF<40% | 63.5 | 30.0 | Ivabradine | No intervention |
| Sarullo       | 2010 | Paper    | 60  | Stable, ischemic heart failure, EF<40%         | 52.7 | 25.0 | Ivabradine | Placebo         |
| Shen          | 2018 | Paper    | 112 | Heart failure                                  | 70.0 | 41.1 | Ivabradine | No intervention |
| Sisakian      | 2015 | Paper    | 54  | Heart failure, EF<40%                          | 59.9 | 18.5 | Ivabradine | No intervention |
| Song          | 2021 | Paper    | 96  | Heart failure                                  | 69.4 | 43.8 | Ivabradine | No intervention |
| Su            | 2020 | Paper    | 70  | Heart failure                                  | 69.0 | 44.3 | Ivabradine | No intervention |
| Su D          | 2020 | Paper    | 60  | Chronic heart failure, EF<50%                  | 61.8 | 48.3 | Ivabradine | No intervention |
| Sun           | 2020 | Paper    | 100 | Heart failure                                  | 62.0 | 42.0 | Ivabradine | No intervention |

|                  |      |          |      |                                                |      |      |            |                 |
|------------------|------|----------|------|------------------------------------------------|------|------|------------|-----------------|
| Sun              | 2021 | Paper    | 118  | Chronic heart failure                          | 67.6 | 43.2 | Ivabradine | No intervention |
| Swedberg (SHIFT) | 2010 | Paper    | 6558 | Heart failure, EF<35%                          | 60.4 | 23.4 | Ivabradine | Placebo         |
| Tang             | 2018 | Paper    | 62   | Heart failure, EF<40%                          | 63.2 | 29.0 | Ivabradine | No intervention |
| Tarlovskaya      | 2011 | Abstract | 18   | Heart failure, EF<35%                          | 53.5 | NR   | Ivabradine | Placebo         |
| Tatarchenko      | 2008 | Paper    | 59   | Coronary artery disease, heart failure, EF>45% | 57.3 | NR   | Ivabradine | No intervention |
| Tsutsui          | 2019 | Paper    | 254  | Heart failure, EF<35%                          | 60.7 | 18.0 | Ivabradine | Placebo         |
| Tsutsui          | 2016 | Paper    | 125  | Heart failure, EF<35%                          | 59.0 | 14.3 | Ivabradine | Placebo         |
| Tumasyan         | 2009 | Abstract | 126  | Severe heart failure                           | NR   | NR   | Ivabradine | No intervention |
| Tumasyan         | 2012 | Abstract | 76   | Heart failure                                  | 57.4 | NR   | Ivabradine | No intervention |
| Tumasyan         | 2016 | Abstract | 210  | Severe heart failure                           | 57.4 | NR   | Ivabradine | No intervention |
| Tumasyan         | 2017 | Abstract | 110  | Heart failure                                  | 63.2 | NR   | Ivabradine | No intervention |
| Tumasyan         | 2018 | Abstract | 91   | Heart failure, mid range EF                    | 50.1 | NR   | Ivabradine | No intervention |
| Vatinian         | 2015 | Abstract | 52   | Coronary artery disease, heart failure, EF<35% | NR   | NR   | Ivabradine | No intervention |
| Wang             | 2019 | Paper    | 68   | Heart failure, EF <35%                         | 55.8 | 0.5  | Ivabradine | No intervention |
| Wang FC          | 2017 | Paper    | 96   | Heart failure                                  | 70.6 | 43.8 | Ivabradine | No intervention |
| Wang JJ          | 2017 | Paper    | 40   | Heart failure                                  | 52.9 | 55.0 | Ivabradine | No intervention |
| Wang Q           | 2017 | Paper    | 120  | Heart failure                                  | 62.3 | 35.0 | Ivabradine | No intervention |
| Wang RM          | 2017 | Paper    | 78   | Heart failure                                  | 59.9 | 28.3 | Ivabradine | No intervention |
| Wang YH          | 2018 | Paper    | 68   | Heart failure                                  | 66.0 | 42.3 | Ivabradine | No intervention |
| Wang GK          | 2020 | Paper    | 72   | Chronic heart failure                          | 68.5 | 48.6 | Ivabradine | No intervention |
| Wang LJ          | 2020 | Paper    | 70   | Chronic heart failure                          | 57.0 | 22.9 | Ivabradine | No intervention |
| Wei              | 2019 | Paper    | 64   | Heart failure, EF<45%                          | 60.6 | 39.7 | Ivabradine | No intervention |
| Xia              | 2016 | Paper    | 78   | Heart failure                                  | 60.7 | 44.9 | Ivabradine | No intervention |
| Xing             | 2018 | Paper    | 20   | Heart failure                                  | 52.7 | 55.0 | Ivabradine | No intervention |
| Xu               | 2019 | Paper    | 77   | Heart failure, EF<50%                          | 68.1 | 0.5  | Ivabradine | No intervention |
| Xu               | 2020 | Paper    | 122  | Heart failure, EF<45%                          | 71.0 | 56.6 | Ivabradine | No intervention |
| Xue              | 2020 | Paper    | 90   | Chronic heart failure                          | 59.2 | 45.6 | Ivabradine | No intervention |
| Yang WT          | 2019 | Paper    | 80   | Heart failure, EF<45%                          | 62.2 | 0.4  | Ivabradine | No intervention |
| Yang Z           | 2019 | Paper    | 135  | Heart failure                                  | 65.7 | 0.3  | Ivabradine | No intervention |
| Yao              | 2016 | Paper    | 72   | Heart failure, EF<40%                          | NR   | NR   | Ivabradine | No intervention |
| Yi               | 2017 | Paper    | 90   | Heart failure, EF<45%                          | 66.6 | 32.2 | Ivabradine | Placebo         |
| Yu               | 2019 | Paper    | 66   | Dilated cardiomyopathy, EF<40%                 | 46.8 | 0.4  | Ivabradine | No intervention |
| Yu               | 2018 | Paper    | 86   | Heart failure                                  | 62.5 | 43.0 | Ivabradine | No intervention |

|          |      |        |     |                                        |      |      |            |                 |
|----------|------|--------|-----|----------------------------------------|------|------|------------|-----------------|
| Yue      | 2016 | Thesis | 80  | Heart failure, EF<40%                  | 68.3 | 50.0 | Ivabradine | No intervention |
| Zeng FC  | 2019 | Paper  | 65  | Heart failure                          | 72.0 | 0.6  | Ivabradine | No intervention |
| Zeng XM  | 2019 | Paper  | 90  | Heart failure                          | 70.6 | 0.5  | Ivabradine | No intervention |
| Zhang    | 2018 | Paper  | 60  | Coronary artery disease, heart failure | 64.2 | 48.3 | Ivabradine | No intervention |
| Zhang J  | 2019 | Paper  | 86  | Heart failure                          | 66.2 | 0.5  | Ivabradine | No intervention |
| Zhang XJ | 2019 | Paper  | 110 | Heart failure                          | 61.6 | 0.4  | Ivabradine | No intervention |
| Zhang    | 2020 | Paper  | 85  | Coronary heart disease, heart failure  | 64.4 | 0.4  | Ivabradine | No intervention |
| Zhang Y  | 2020 | Paper  | 54  | Chronic heart failure                  | NR   | 51.9 | Ivabradine | No intervention |
| Zhang    | 2021 | Paper  | 94  | Chronic heart failure                  | 70.9 | 44.7 | Ivabradine | No intervention |
| Zhao     | 2020 | Paper  | 80  | Chronic heart failure                  | 68.3 | 46.3 | Ivabradine | No intervention |
| Zhou     | 2019 | Thesis | 60  | Heart failure                          | 54.8 | 0.4  | Ivabradine | No intervention |
| Zhou     | 2020 | Paper  | 86  | Heart failure, EF<35%, HR>100          | 65   | 47.7 | Ivabradine | No intervention |
